# Supplementary material for: Integrated DNA methylome and transcriptome analysis reveals the ethylene-induced flowering pathway genes in pineapple
Source: PubMed Central journal article supplement (PMC5719354; doi:10.1038/s41598-017-17460-5), 2017-12-07
Supplement: 41598_2017_17460_MOESM1_ESM.pdf [file 41598_2017_17460_MOESM1_ESM.pdf]

Supplementary Information

## Integrated DNA methylome and transcriptome analysis reveals the ethylene-induced flowering pathway genes in pineapple

Jiabin Wang<sup>123†</sup>, Zhiying Li<sup>123†</sup>, Ming Lei<sup>123</sup>, Yunliu Fu<sup>123</sup>, Jiaju Zhao<sup>123</sup>, Mengfei Ao<sup>123</sup>, Li Xu

<sup>123\*</sup>

1 Institute of Tropical Crop Genetic Resources, Chinese Academy of Tropical Agricultural Sciences, Danzhou 571737, Hainan, China

2 Ministry of Agriculture Key Laboratory of Crop Gene Resources and Germplasm Enhancement in Southern China, Danzhou, 571737, Hainan, China

3 Hainan Province Key Laboratory of Tropical Crops Germplasm Resources Genetic Improvement and Innovation, Danzhou 571737, Hainan, China

\*Corresponding author

Email: [xllizhiying@vip.163.com](mailto:xllizhiying@vip.163.com)

† These authors contributed equally to this work.

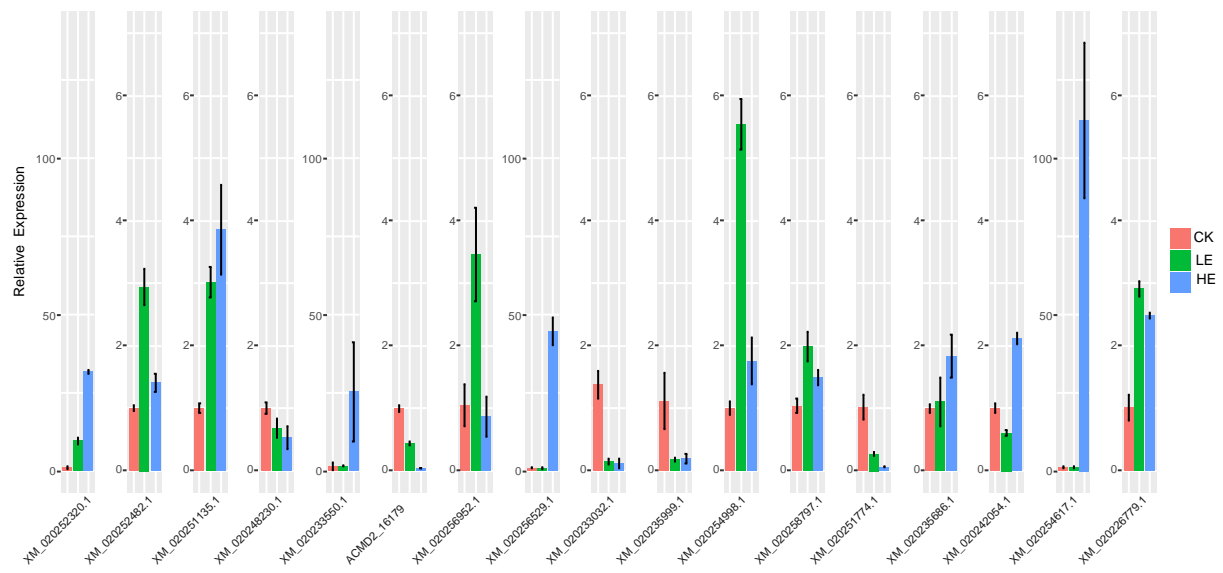

Supplementary Figure S1 qRT-PCR validation of differentially expressed genes.

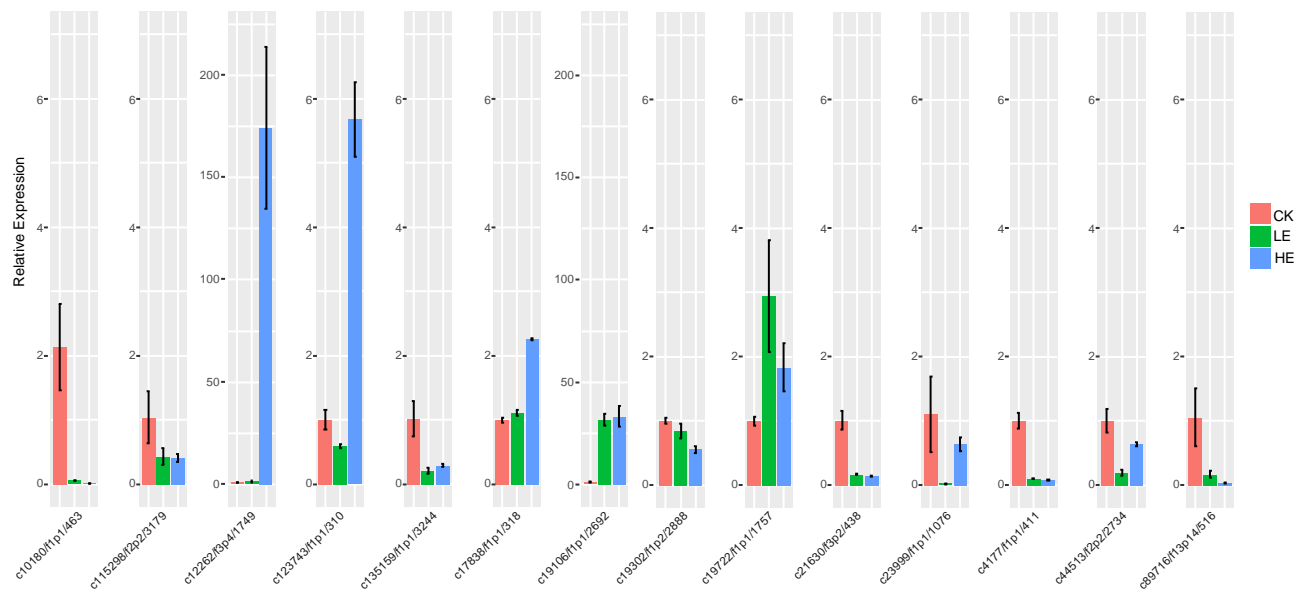

Supplementary Figure S2 qRT-PCR validation of differentially expressed lncRNAs.

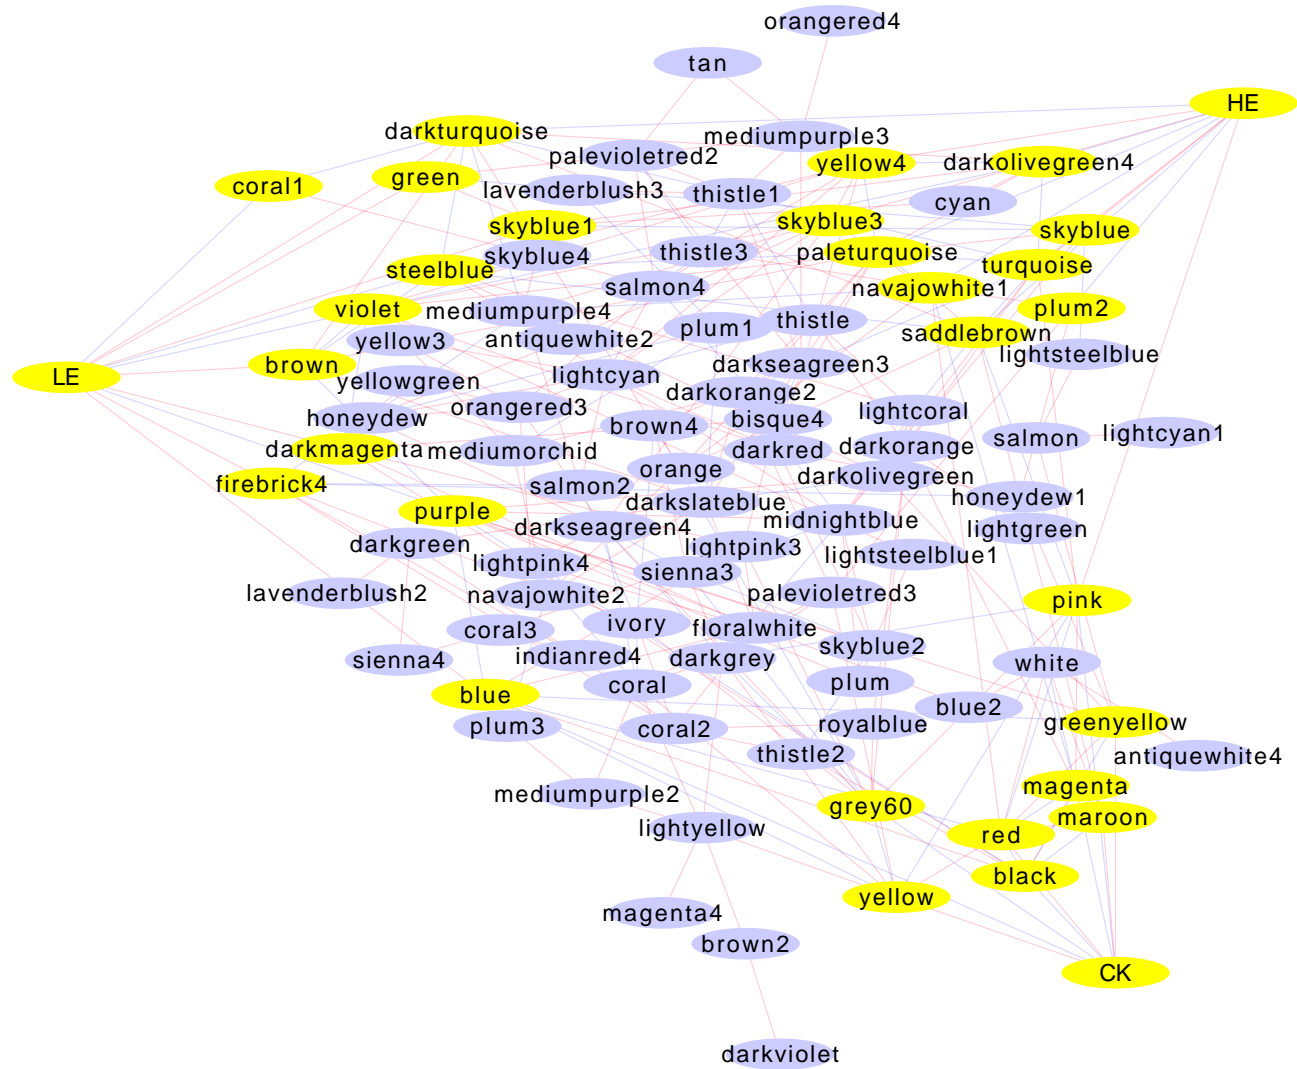

Supplementary Figure S3 The interaction network of clusters. Edges in red represent positive interactions and edges in blue represent negative interactions.

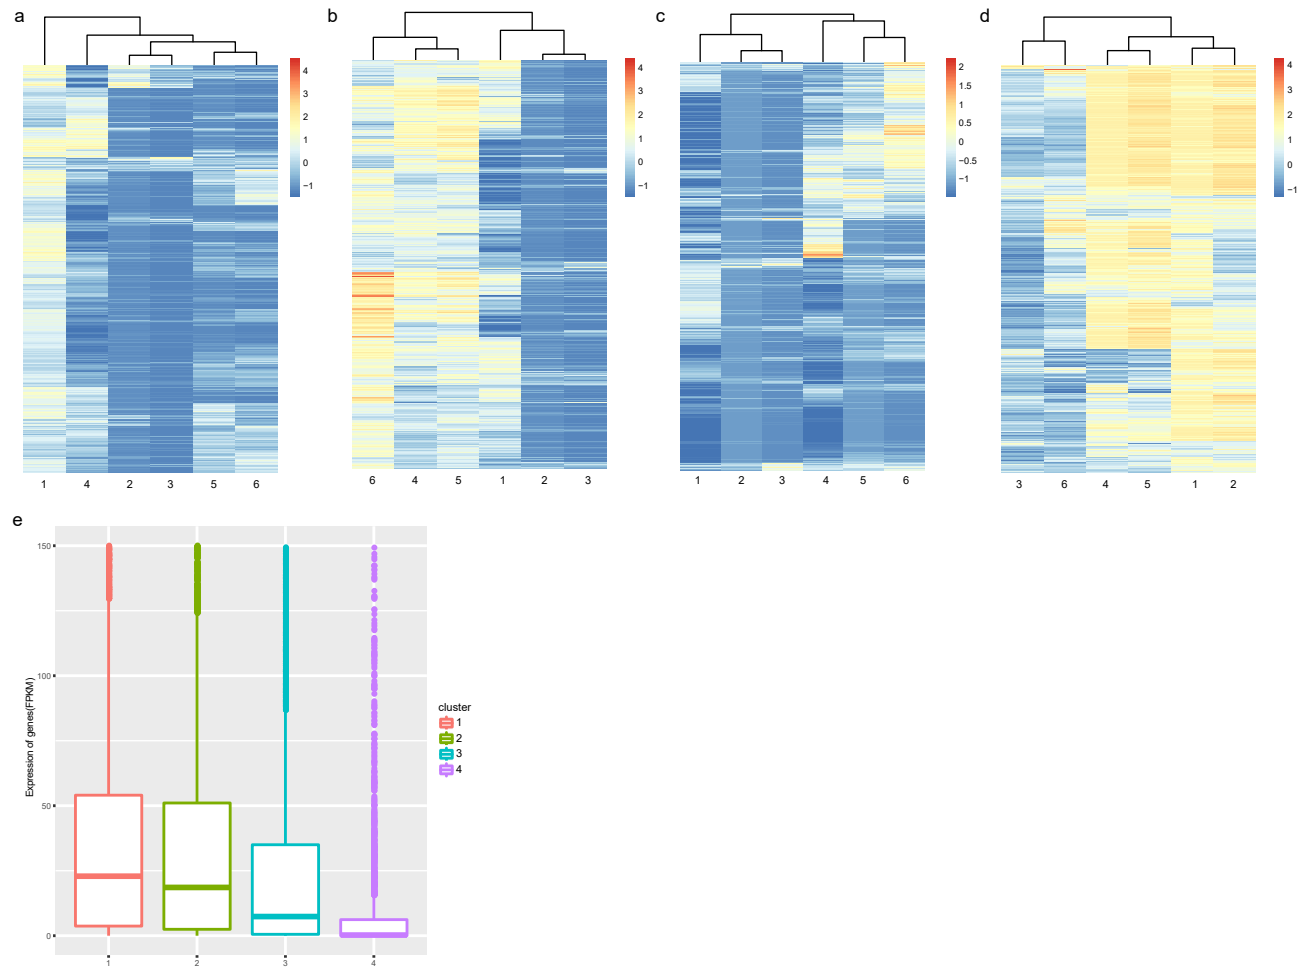

Supplementary Figure S4 The methylation type of the pineapple genome in CK, LE and HE. A-D: the heatmap of cluster 1-4. 1: the CG methylation of gene upstream; 2: the CHG methylation of gene upstream; 3: the CHH methylation of gene upstream; 4: the CG methylation of gene body; 5: the CHG methylation of gene body; 6: the CHH methylation of gene body.

Supplementary Table S1 Summary of iso-seq reads.

| <b>Library</b> | <b>reads of insert</b> | <b>five prime reads</b> | <b>three prime reads</b> | <b>poly-A reads</b> | <b>full-length non-chimeric reads</b> | <b>full-length non-chimeric read length(bp)</b> |
|----------------|------------------------|-------------------------|--------------------------|---------------------|---------------------------------------|-------------------------------------------------|
| <b>&lt;1K</b>  | 306,524                | 224,869(73.36%)         | 240,144(78.34%)          | 227,525(74.23%)     | 184,148(60.08%)                       | 649                                             |
| <b>1-2 K</b>   | 325,575                | 284,151(87.28%)         | 293,958(90.29%)          | 295,218(90.68%)     | 257,914(79.22%)                       | 1,835                                           |
| <b>2-3 K</b>   | 311,218                | 265,959(85.46%)         | 277,735(89.24%)          | 280,311(90.07%)     | 241,999(77.76%)                       | 2,947                                           |
| <b>&gt;3 K</b> | 365,242                | 305,471(83.64%)         | 269,573(73.81%)          | 52,955(14.5%)       | 41,812(11.45%)                        | 2,810                                           |
| <b>Total</b>   | 1,308,559              | 774,999                 | 1,081,410                | 856,009             | 725,873                               |                                                 |

Supplementary Table S2 Summary of high quality reads and low quality reads.

| <b>Library</b> | <b>Cluster type</b> | <b>Total isoforms</b> | <b>Total base(bp)</b> | <b>Mean Quality</b> | <b>Mean isoform length(bp)</b> | <b>Mean Full length coverage</b> | <b>Mean Non Full length coverage</b> |
|----------------|---------------------|-----------------------|-----------------------|---------------------|--------------------------------|----------------------------------|--------------------------------------|
| >3 K           | High quality        | 9,967                 | 24,357,387            | 0.9835              | 2,444                          | 2.00                             | 2.08                                 |
| >3 K           | Low quality         | 18,953                | 55,194,220            | 0.2314              | 2,912                          | 1.15                             | 0.96                                 |
| <1 K           | High quality        | 36,152                | 21,664,343            | 0.9468              | 599                            | 4.02                             | 4.53                                 |
| <1 k           | Low quality         | 34,417                | 22,854,299            | 0.3576              | 664                            | 1.12                             | 0.84                                 |
| 1-2 K          | High quality        | 40,673                | 74,763,153            | 0.9793              | 1,838                          | 3.40                             | 3.62                                 |
| 1-2 K          | Low quality         | 91,253                | 166,799,036           | 0.0672              | 1,828                          | 1.31                             | 1.21                                 |
| 2-3 K          | High quality        | 35,546                | 102,935,180           | 0.9851              | 2,896                          | 3.40                             | 3.68                                 |
| 2-3 K          | Low quality         | 90,294                | 271,114,998           | 0.0976              | 3,003                          | 1.34                             | 1.23                                 |

Supplementary Table S3 Summary of Illumina short reads.

| <b>Sample Name</b> | <b>Clean reads</b> | <b>Genome map rate</b> | <b>Gene map rate</b> | <b>Expressed gene</b> |
|--------------------|--------------------|------------------------|----------------------|-----------------------|
| HE1                | 30487590           | 55.15%                 | 40.63%               | 19197                 |
| HE2                | 30085504           | 55.09%                 | 41.21%               | 19073                 |
| HE3                | 29442846           | 57.28%                 | 41.63%               | 19156                 |
| CK1                | 26870796           | 59.65%                 | 43.62%               | 18497                 |
| CK2                | 29999998           | 60.18%                 | 43.10%               | 18775                 |
| CK3                | 27224962           | 60.87%                 | 43.61%               | 18732                 |
| LE1                | 29526890           | 62.19%                 | 44.17%               | 19101                 |
| LE2                | 29688904           | 61.42%                 | 43.62%               | 19300                 |
| LE3                | 26878052           | 59.63%                 | 43.51%               | 19067                 |



Supplementary Table S4 The primer for protein coding gene qRT-PCR validation.

| Accession Number | Sense Primer           | Anti-sense Primer      | Amplicon Length (bp) | E(%)  | R <sup>2</sup> |
|------------------|------------------------|------------------------|----------------------|-------|----------------|
| XM_020227265.1   | ATATACGAAGGATACGCTCTC  | CCGTCAGGCAACTCATAG     | 242                  | 100.4 | 0.999          |
| XM_020252320.1   | GACCGCCTTGTTGTGATA     | GTGTTCCAGTAGTTCTTGATG  | 322                  | 100.2 | 0.999          |
| XM_020252482.1   | GCTATATTCGTCGTAGTCAAC  | CCTTGTAATCACCTGGATATG  | 139                  | 99.7  | 0.992          |
| XM_020251135.1   | CAACAGCAGTCACCTCTAT    | CTTCAGCAGCAGAACCTT     | 146                  | 105.8 | 0.997          |
| XM_020248230.1   | GAGGTTGCCGCTTATGAT     | CCACACGCTTATGATTGC     | 189                  | 106.3 | 0.993          |
| XM_020233550.1   | CTTCTACAGTAACAGGACAATG | GAATATCAGTCACCATCCAGT  | 191                  | 102.6 | 0.991          |
| ACMD2_16179      | GAGGCGGTTCACTACAAC     | GTCGAAGGCTTCCAGTATG    | 375                  | 97.6  | 0.999          |
| XM_020256952.1   | CATAATCCGACTGCTCTCA    | AACTTCTTGCTCCAACCTCA   | 312                  | 102.4 | 0.995          |
| XM_020256529.1   | CCATTGACTACATGAAGGAG   | CACACTGCTGAATCTCTAAC   | 264                  | 108.3 | 0.999          |
| XM_020233032.1   | CCACCACCACAAGATGAG     | CGGCTGAGAAGAGATATGAA   | 290                  | 106.9 | 0.994          |
| XM_020235999.1   | CGACGGAGAAGTGTAAGAG    | CGACTATGTGCCTGGTTG     | 306                  | 102.8 | 0.999          |
| XM_020254998.1   | ACAACCGAGCAGATTCAG     | AGATCCGACTCCTCCAAG     | 250                  | 103.9 | 0.992          |
| XM_020258797.1   | TTCAAGGAGAAGCAGCAG     | CGTTGTTGGAATTGGAGAG    | 220                  | 104.7 | 0.998          |
| XM_020251774.1   | GAATCACCACCGCTGTTG     | TCTCCTCATCGGCTTCTC     | 103                  | 98.6  | 0.992          |
| XM_020235686.1   | TAGCAGGTTCCATCAGTTG    | AGCTGTTTCGATGATAATCCA  | 307                  | 99.4  | 0.995          |
| XM_020242054.1   | GTCCTGGATGGCTATGATG    | CGCTCGTGTAGATGAAGAT    | 187                  | 103.5 | 0.999          |
| XM_020254617.1   | GATTCTCAGCTTGCTACCA    | GCCACGACTTATTATTATCCTC | 487                  | 104.4 | 0.993          |
| XM_020226779.1   | TACAGTAACAGGACAATGGT   | GCCAGAAGCAGAGATGAA     | 237                  | 106.5 | 0.998          |

E: PCR PCR efficiencies. R<sup>2</sup>: linear correlation coefficient. ACMD2\_16179 is the transcript of gene coding protein QAY62772.1.

Supplementary Table S5 The primer for lncRNA qRT-PCR validation.

| Accession Number  | Sense Primer           | Anti-sense Primer     | Amplicon Length | E(%)  | R <sup>2</sup> |
|-------------------|------------------------|-----------------------|-----------------|-------|----------------|
| c10180/f1p1/463   | TTTAGGTCGTTCGGGAATA    | ACTCAAGTATGGTGTAAAGGA | 143             | 98.3  | 0.999          |
| c19722/f1p1/1757  | CATCCTCTTCTCACCATACG   | CTTCGCACACCAGCATAA    | 188             | 99.6  | 0.999          |
| c19302/f1p2/2888  | AGCCGCCTTATCACCTTA     | CGACTATCCTGAAGAACCAA  | 498             | 101.2 | 0.999          |
| c44513/f2p2/2734  | GCGTGTAAGTATGGTGGTT    | ATGTGGAGTCGTGATGGT    | 182             | 99.5  | 0.992          |
| c23999/f1p1/1076  | TACTCTTAGGTGGTGAATCG   | ATGCTTGTTGACGGTGAA    | 455             | 100.3 | 0.995          |
| c4177/f1p1/411    | ATTGTAGTCGGCGATGATT    | AATTCTCCAGTCACTCTCAA  | 141             | 104.6 | 0.993          |
| c115298/f2p2/3179 | CCGACTAATGCCGATTCC     | CCAGACAAGAAGACGAAGG   | 190             | 102.9 | 0.997          |
| c17838/f1p1/318   | GAGAATGCCAATGAAGAGG    | GCCCACAATTTTCATATCACA | 144             | 104.8 | 0.994          |
| c123743/f1p1/310  | AGTCACGACCACTACAACA    | GTCCTGCAAACACGAAA     | 100             | 106.2 | 0.997          |
| c89716/f13p14/516 | GAGTTACGTGCGTACATAC    | AGCAATAACAGAGTGAACAG  | 317             | 100.5 | 0.999          |
| c135159/f1p1/3244 | CAACTGATGGAACCTATGATG  | GGTGGCAATAGCATTATGTT  | 261             | 101.7 | 0.995          |
| c19106/f1p1/2692  | TAACTGCTCAACAACCTCTCA  | TTCCTCTTCTCCTCTTCC    | 463             | 97.8  | 0.998          |
| c21630/f3p2/438   | GGATCGAGTAGCTCTATTAGG  | CCGTCCTCTTCAATCAGTT   | 131             | 99.3  | 0.997          |
| c12262/f3p4/1749  | GCCACGACTTATTATTATCCTC | CCACACTTGCTTCAATCAC   | 173             | 106.8 | 0.996          |

E: PCR PCR efficiencies. R2: linear correlation coefficient.

Supplementary Dataset S1 Annotation of novel coding transcripts.

Supplementary Dataset S2 Gene information on flowering-related subnetworks.

Supplementary Dataset S3 The DMRs overlapped with genes of flowering related subnetworks.
